# Supplementary material for: Do final‐year medical students have sufficient prescribing competencies? A systematic literature review
Source: PubMed Central journal article supplement — Br J Clin Pharmacol. 2018 Jan 25;84(4):615–35. doi: 10.1111/bcp.13491 (PMC5867102; doi:10.1111/bcp.13491), 2018-01-25
Supplement: BCP-84-615-s002.pdf [file BCP-84-615-s002.pdf]

# Appendix 1 - BEME Coding Sheet

## 1 Administrative

Reference Number: \_\_\_\_\_ Reviewer: \_\_\_\_\_

Type:  Book  Guidelines  Letter  Report  
 Comment  Interview  News  Statistical data  
 Conf. Paper/Proceedings  Journal article  Non-peer review article  Test(s)  
 Editorial  Lecture  Official publication  Thesis

Citation Information:

Authors: \_\_\_\_\_

Title: \_\_\_\_\_

Publication: \_\_\_\_\_ Vol;Issue;Pages \_\_\_\_\_

Search Method:

Electronic search  Hand search  Grey literature  Recommendation

## 2 Evaluation Methods

### a Research design (tick all that apply)

#### *Non-comparative studies*

|              | Implied                  | Stated                   |                | Implied                  | Stated                   |             | Implied                  | Stated                   |
|--------------|--------------------------|--------------------------|----------------|--------------------------|--------------------------|-------------|--------------------------|--------------------------|
| Audit        | <input type="checkbox"/> | <input type="checkbox"/> | Expert opinion | <input type="checkbox"/> | <input type="checkbox"/> | Narrative   | <input type="checkbox"/> | <input type="checkbox"/> |
| Action-based | <input type="checkbox"/> | <input type="checkbox"/> | Focus group    | <input type="checkbox"/> | <input type="checkbox"/> | Observation | <input type="checkbox"/> | <input type="checkbox"/> |
| Case series  | <input type="checkbox"/> | <input type="checkbox"/> | Historical     | <input type="checkbox"/> | <input type="checkbox"/> | Survey      | <input type="checkbox"/> | <input type="checkbox"/> |

If any of the above categories were checked, further define the approach used:

Cites evidence w/data  Conceptual   
 Descriptive  Commentary

#### *Comparative studies*

|                        | Implied                  | Stated                   |               | Implied                  | Stated                   |                | Implied                  | Stated                   |
|------------------------|--------------------------|--------------------------|---------------|--------------------------|--------------------------|----------------|--------------------------|--------------------------|
| Cross sectional        | <input type="checkbox"/> | <input type="checkbox"/> | Case control  | <input type="checkbox"/> | <input type="checkbox"/> |                |                          |                          |
| Single group studies   |                          |                          | Cohort study  | Implied                  | Stated                   | Trials         | Implied                  | Stated                   |
| Before & after studies | <input type="checkbox"/> | <input type="checkbox"/> | Prospective   | <input type="checkbox"/> | <input type="checkbox"/> | Non-randomized | <input type="checkbox"/> | <input type="checkbox"/> |
| Time series            | <input type="checkbox"/> | <input type="checkbox"/> | Retrospective | <input type="checkbox"/> | <input type="checkbox"/> | Randomized     | <input type="checkbox"/> | <input type="checkbox"/> |

#### *Review*

Implied  Stated

If any of the above categories were checked, further define the approach used:

Cites evidence w/data  Conceptual   
 Descriptive  Commentary

#### *Meta-analysis*

### b Data collection methods

Interview  Observation  Opinion  MCQ exam  
 Patient outcomes  Questionnaire  Data from simulator/simulation

### 3 Expected learning outcomes of intervention or approach (tick all that apply)

This section relates to the *intended* or *expected* learning outcomes for the educational intervention or educational approach described. This is different from the *impact* of the study (section 6).

|                                | Implied                  | Stated                   |                                       | Implied                  | Stated                   |
|--------------------------------|--------------------------|--------------------------|---------------------------------------|--------------------------|--------------------------|
| Clinical Skills                | <input type="checkbox"/> | <input type="checkbox"/> | Understanding basic/clinical sciences | <input type="checkbox"/> | <input type="checkbox"/> |
| Practical procedures           | <input type="checkbox"/> | <input type="checkbox"/> | Appropriate attitudes                 | <input type="checkbox"/> | <input type="checkbox"/> |
| Patient investigation          | <input type="checkbox"/> | <input type="checkbox"/> | Appropriate decision making           | <input type="checkbox"/> | <input type="checkbox"/> |
| Patient management             | <input type="checkbox"/> | <input type="checkbox"/> | Role of health professional           | <input type="checkbox"/> | <input type="checkbox"/> |
| Health promotion               | <input type="checkbox"/> | <input type="checkbox"/> | Personal development                  | <input type="checkbox"/> | <input type="checkbox"/> |
| Communication                  | <input type="checkbox"/> | <input type="checkbox"/> | Patient safety/reducing errors        | <input type="checkbox"/> | <input type="checkbox"/> |
| Appropriate information skills | <input type="checkbox"/> | <input type="checkbox"/> |                                       |                          |                          |

Please indicate specific skill (i.e., cardiac exam, intubation, venipuncture, etc) \_\_\_\_\_

### 4 Context (Target Population), if applicable

Number of Subjects / Size of Group \_\_\_\_\_

Country / Location of study \_\_\_\_\_

Duration of exposure:     <10 hours     10 – 100 hours     100+ hours     Other

Frequency of exposure:     <2X     2-5X     6-10X     >10X  
 (# of times/episodes simulator was used)

Level / stage:

- |                                                |                                                                                   |
|------------------------------------------------|-----------------------------------------------------------------------------------|
| <input type="checkbox"/> Pre-college           | <input type="checkbox"/> CPD/CME                                                  |
| <input type="checkbox"/> Undergraduate college | <input type="checkbox"/> Higher general other than healthcare professional        |
| <input type="checkbox"/> Medical school        | <input type="checkbox"/> Undergraduate other than healthcare professional (early) |
| <input type="checkbox"/> Residency             | <input type="checkbox"/> Undergraduate other than healthcare professional (later) |
| <input type="checkbox"/> Fellowship            | <input type="checkbox"/> Pre-registration/basic professional education            |

Profession:

- |                                                                                                         |                                              |
|---------------------------------------------------------------------------------------------------------|----------------------------------------------|
| <input type="checkbox"/> Health sciences                                                                | <input type="checkbox"/> Non-health sciences |
| <input type="checkbox"/> Primary care medicine (internal medicine, family medicine, pediatrics, Ob/Gyn) |                                              |
| <input type="checkbox"/> Medicine sub-specialty (cardiology, GI, pulm)                                  |                                              |
| <input type="checkbox"/> Surgery                                                                        |                                              |
| <input type="checkbox"/> Anesthesia                                                                     |                                              |
| <input type="checkbox"/> Dentistry                                                                      |                                              |
| <input type="checkbox"/> Nursing                                                                        |                                              |
| <input type="checkbox"/> Professions allied to medicine                                                 |                                              |
| <input type="checkbox"/> Veterinary                                                                     |                                              |

Please indicate specific skill (i.e., cardiology, emergency medicine, anesthesiology etc) \_\_\_\_\_

Certification:

- High stake (licensing, board certification), requirement for promotion to next level of training
- Low stake (requirement to pass course, components for all grade/evaluation, etc)
- Unclear / not applicable

## 5 Stated aim of study

Aim / objective of item

Implied

Stated

---



---



---

## 6 Impact of intervention studied

Code the level of impact being studied in the item and summarize any results of the intervention at the appropriate level. Note: include both predetermined and unintended outcomes.

### Kirkpatrick hierarchy

**Level 1**      **Participation** - covers learners' views on the learning experience, its organization, presentation, content, teaching methods, and aspects of the instructional organization, materials, quality of instruction

---



---

**Level 2a**      **Modification of attitudes/perceptions** - outcomes here relate to changes in the reciprocal attitudes or perceptions between participant groups toward intervention/simulation

---



---

**Level 2b**      **Modification of knowledge/skills** - for *knowledge*, this relates to the acquisition of concepts, procedures and principles; for *skills* this relates to the acquisition of thinking/problem-solving, psychomotor and social skills

---



---

**Level 3**      **Behavioral change** - documents the transfer of learning to the workplace or willingness of learners to apply new knowledge & skills.

---



---

**Level 4a**      **Change in organizational practice** - wider changes in the organizational delivery of care, attributable to an educational program

---



---

**Level 4b**      **Benefits to patient / clients** - any improvement in the health & well being of patients/clients as a direct result of an educational program.

---



---

## 7 Rate evaluation methods

|                                                 | Strongly disagree        | Disagree                 | Uncertain                | Agree                    | Strongly agree           |
|-------------------------------------------------|--------------------------|--------------------------|--------------------------|--------------------------|--------------------------|
| 1 Appropriateness of study/review design        | <input type="checkbox"/> |
| 2 Implementation of study/review design         | <input type="checkbox"/> |
| 3 Appropriateness of data analysis              | <input type="checkbox"/> |
| 4 Comment on evaluation methods, if applicable: | <hr/>                    |                          |                          |                          |                          |

---

## 8 Strength of findings

|                                                      | Low<br>1                 | 2                        | 3                        | 4                        | High<br>5                |
|------------------------------------------------------|--------------------------|--------------------------|--------------------------|--------------------------|--------------------------|
| 1 No clear conclusions can be drawn. Not significant | <input type="checkbox"/> |
| 2 Results ambiguous, but there appears to be a trend | <input type="checkbox"/> |
| 3 Conclusions can probably be based on the results   | <input type="checkbox"/> |
| 4 Results are clear and very likely to be true       | <input type="checkbox"/> |
| 5 Results are unequivocal                            | <input type="checkbox"/> |

## 9 Educational descriptors (tick all that apply)

To provide a conceptual context of study, please check the educational descriptors for each of the following categories:

|                   |                                             |                                                 |                                                       |                                            |
|-------------------|---------------------------------------------|-------------------------------------------------|-------------------------------------------------------|--------------------------------------------|
| Curriculum:       | <input type="checkbox"/> Community oriented | <input type="checkbox"/> Integrated, horizontal | <input type="checkbox"/> Multiprofessional            | <input type="checkbox"/> Outcome-based     |
|                   | <input type="checkbox"/> Core               | <input type="checkbox"/> Integrated, vertical   | <input type="checkbox"/> Options/special study module | <input type="checkbox"/> Problem-based     |
| Learning:         | <input type="checkbox"/> Clinical           | <input type="checkbox"/> Co-operative           | <input type="checkbox"/> Lectures                     | <input type="checkbox"/> Small group       |
|                   | <input type="checkbox"/> Computer           | <input type="checkbox"/> Independent            | <input type="checkbox"/> Simulation                   | <input type="checkbox"/> Work-based        |
| Physical setting: | <input type="checkbox"/> Classroom          | <input type="checkbox"/> Ambulatory care        | <input type="checkbox"/> Training center              | <input type="checkbox"/> Distance learning |
|                   | <input type="checkbox"/> Teaching hospital  | <input type="checkbox"/> Laboratory             | <input type="checkbox"/> Clinical experience          | <input type="checkbox"/> Other _____       |
| Assessment:       | <input type="checkbox"/> Feedback           | <input type="checkbox"/> Portfolio              | <input type="checkbox"/> Practical                    | <input type="checkbox"/> Written           |

## 10 Educational features and uses of simulation (tick all that apply)

|                                                       | Implied                  | Stated                   |
|-------------------------------------------------------|--------------------------|--------------------------|
| Driven by valid curriculum-based educational need     | <input type="checkbox"/> | <input type="checkbox"/> |
| Integrated into curriculum                            | <input type="checkbox"/> | <input type="checkbox"/> |
| Outcomes clearly defined to learner                   | <input type="checkbox"/> | <input type="checkbox"/> |
| Authenticity and realism (validity) of the simulation | <input type="checkbox"/> | <input type="checkbox"/> |
| Ability to control learning environment               | <input type="checkbox"/> | <input type="checkbox"/> |
| User-friendly for learner                             | <input type="checkbox"/> | <input type="checkbox"/> |
| User-friendly for instructor                          | <input type="checkbox"/> | <input type="checkbox"/> |
| The presence of feedback                              | <input type="checkbox"/> | <input type="checkbox"/> |
| Allows independent learning                           | <input type="checkbox"/> | <input type="checkbox"/> |
| Opportunity to change level of difficulty             | <input type="checkbox"/> | <input type="checkbox"/> |
| Allows instructor-based learning                      | <input type="checkbox"/> | <input type="checkbox"/> |
| High/low degree of maintenance                        | <input type="checkbox"/> | <input type="checkbox"/> |
| Need for support of faculty and other personnel       | <input type="checkbox"/> | <input type="checkbox"/> |
| A method of documenting learner performance           | <input type="checkbox"/> | <input type="checkbox"/> |
| Use at multiple learner levels                        | <input type="checkbox"/> | <input type="checkbox"/> |
| Use for multiple health-professional categories       | <input type="checkbox"/> | <input type="checkbox"/> |
| Ability to provide variety of clinical conditions     | <input type="checkbox"/> | <input type="checkbox"/> |
| Suitability for individual                            | <input type="checkbox"/> | <input type="checkbox"/> |
| Suitability for small-group                           | <input type="checkbox"/> | <input type="checkbox"/> |
| Suitability for large-group learning                  | <input type="checkbox"/> | <input type="checkbox"/> |
| Role of teacher clearly defined                       | <input type="checkbox"/> | <input type="checkbox"/> |
| Document participation                                | <input type="checkbox"/> | <input type="checkbox"/> |
| Document level of skill                               | <input type="checkbox"/> | <input type="checkbox"/> |
| Opportunity for repetitive practice                   | <input type="checkbox"/> | <input type="checkbox"/> |
| Additional feature/use (licensure/certification,etc)  | _____                    |                          |

## 11 Specific features of simulation

Indicate type / name of simulator \_\_\_\_\_

Indicate manufacturer / company of simulator \_\_\_\_\_

**Specific capabilities of simulation / simulator** (tick all that apply)

Simulates bedside findings (heart sounds, respiration)

Simulates procedure (endoscopy, intubation)

Responds and reacts to user (anesthesia induction, ACLS)

Other imbedded simulation capability \_\_\_\_\_

## 12 Documented improvement in learning/performance

If the article provided documentation for improvement in learning / performance, check the appropriate area:

Cognitive knowledge

Skills (demonstrated in):  Simulation  Real patient environment

Hands-on psychomotor skills

Management decision skills

High-level communication skills

Attitude, where appropriate

Other \_\_\_\_\_

## 13 Overall impression of article

Please make any additional comments regarding the overall *strengths* and *weaknesses* of the article.

---

---

---

---

---

---
